# Supplementary material for: Control of cholesterol homeostasis by entero-hepatic bile transport – the role of feedback mechanisms
Source: Royal Society of Chemistry journal article supplement (doi:10.1039/c4ra09397f), 2014-01-01
Supplement: c4ra09397f1.pdf [file c4ra09397f1.pdf]

## Supplementary Information

### Control of Cholesterol homeostasis by Entero-hepatic bile transport – Role of feedback mechanisms

Shekhar Mishra<sup>#</sup>, Pramod R. Somvanshi<sup>#</sup>, K. V. Venkatesh<sup>\*</sup>

<sup>\*</sup>Department of Chemical Engineering, Indian Institute of Technology Bombay, Powai, Mumbai 400076, INDIA. Fax: +91-22-2572 6895; Tel: +91-22-2572 7223; E-mail: venks@iitb.ac.in

<sup>#</sup> SM and PRS contributed equally to this work.

The model details are presented below. The model equations for the network shown in Fig 1 (and Fig S1) are also presented below.

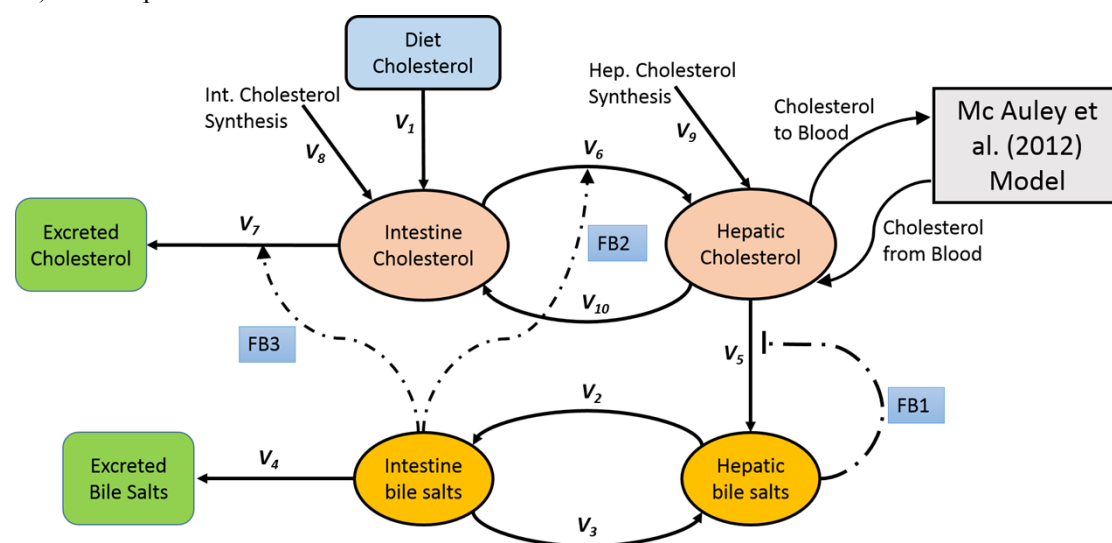

Figure S1

#### Parameters description for cholesterol model

$$MW_{chol} = 386.65 \text{ g/mol};$$

$$MW_{chol-est} = 386.65 \text{ g/mol};$$

$$MW_{bile} = 430.6 \text{ g/mol};$$

$$Vol_L = 1.5 \text{ L};$$

$$Vol_I = 1.9 \text{ L};$$

$$Vol_P = 25 \text{ L};$$

$$VC = 10;$$

$$Time = 1440 \text{ min};$$

| Parameters | Rate Description                                | Values              | Units      |
|------------|-------------------------------------------------|---------------------|------------|
| <b>k1</b>  | Diet absorption in to the intestine             | $\frac{1}{Time}$    | $min^{-1}$ |
| <b>k2</b>  | Transport of bile salts from liver to intestine | $\frac{6.0}{Time}$  | $min^{-1}$ |
| <b>k3</b>  | Transport of bile salts from intestine to liver | $\frac{4.29}{Time}$ | $min^{-1}$ |

|                          |                                                                           |                                             |                   |
|--------------------------|---------------------------------------------------------------------------|---------------------------------------------|-------------------|
| <b>k4</b>                | Excretion of bile salts from intestine                                    | $\frac{0.856}{Time}$                        | $min^{-1}$        |
| <b>k5</b>                | Synthesis of hepatic bile salts from hepatic free cholesterol             | $\frac{2.66}{MW_{bile} * Vol_L * Time}$     | $mM/min$          |
| <b>k6</b>                | Intestinal cholesterol absorption (from intestine to liver)               | $(5.286 * 10^{-4}) * V$                     | $mM^{-1}min^{-1}$ |
| <b>k7</b>                | Intestinal cholesterol excretion                                          | $(5.286 * 10^{-4}) * V$                     | $mM^{-1}min^{-1}$ |
| <b>Kdc</b>               | Km value for Diet absorption                                              | $\frac{304}{MW_{chol} * Vol_I}$             | $mM$              |
| <b>Kbs1</b>              | Km value for hepatic bile synthesis (substrate)                           | 103.45                                      | $mM$              |
| <b>Kbs2</b>              | Km value for hepatic bile synthesis (regulation)                          | 0.62                                        | $mM$              |
| <b>nbs</b>               | Cooperativity for regulation in hepatic bile synthesis                    | 2                                           | –                 |
| <b>Kic1</b>              | Km value for intestinal cholesterol absorption (regulation)               | $2 * 0.571$                                 | $mM$              |
| <b>Kic2</b>              | Km value for intestinal cholesterol absorption (substrate)                | $2 * 4.28$                                  | $mM$              |
| <b>nic1</b>              | Cooperativity for regulation in intestinal cholesterol absorption         | 2.5                                         | –                 |
| <b>nic2</b>              | Cooperativity for substrate kinetics in intestinal cholesterol absorption | 1                                           | –                 |
| <b>Kbe</b>               | Km value for intestinal bile excretion                                    | 0.571                                       | $mM$              |
| <b>ICS<sub>max</sub></b> | Vmax for intestinal cholesterol synthesis                                 | $\frac{10^2}{MW_{chol} * Vol_I * Time}$     | $mM/min$          |
| <b>IC<sub>t</sub></b>    | Km for intestinal cholesterol synthesis                                   | $\frac{3.12 * 10^3}{MW_{chol} * Vol_I}$     | $mM$              |
| <b>IS</b>                | Cooperativity for intestinal cholesterol synthesis                        | 5                                           | –                 |
| <b>HCS<sub>max</sub></b> | Vmax for hepatic cholesterol synthesis                                    | $\frac{5 * 10^2}{MW_{chol} * Vol_L * Time}$ | $mM/min$          |
| <b>HC<sub>t</sub></b>    | Km for hepatic cholesterol synthesis                                      | $\frac{9.3925 * 10^4}{MW_{chol} * Vol_L}$   | $mM$              |
| <b>HS</b>                | Cooperativity for hepatic cholesterol synthesis                           | 5                                           | –                 |
| <b>BCR<sub>max</sub></b> | Vmax for biliary cholesterol release                                      | $\frac{2 * 10^3}{MW_{chol} * Vol_L * Time}$ | $mM/min$          |
| <b>BCR<sub>t</sub></b>   | Km for biliary cholesterol release                                        | $\frac{5.5326 * 10^4}{MW_{chol} * Vol_L}$   | $mM$              |
| <b>BS</b>                | Cooperativity for biliary cholesterol release                             | 5                                           | –                 |
| <b>Diet chol</b>         | Dietary cholesterol                                                       | $\frac{304}{MW_{chol} * Vol_I}$             | $mM$              |

| Reaction Rate | Description | Rate Expression |
|---------------|-------------|-----------------|
|---------------|-------------|-----------------|

|                         |                                                                             |                                                                                                                                                                                 |
|-------------------------|-----------------------------------------------------------------------------|---------------------------------------------------------------------------------------------------------------------------------------------------------------------------------|
| $V_1 : Diet\_absp$      | Rate of absorption of cholesterol from diet                                 | $k1 * DC$                                                                                                                                                                       |
| $V_2 : BS\_release$     | Rate of bile salt release from liver to intestine                           | $k2 * HBS$                                                                                                                                                                      |
| $V_3 : HBS\_return$     | Rate of bile salt transport from intestine to liver                         | $k3 * IBS$                                                                                                                                                                      |
| $V_4 : BS\_excr$        | Rate of bile salt excretion from the intestine                              | $(k4 * 0.571 * 2) * \left( \frac{IBS}{Kbe + IBS} \right) * Eff$                                                                                                                 |
| $V_5 : BS\_synth$       |                                                                             | $\left( k5 * 2 * \frac{103.45}{0.62} * \left( \frac{0.62^{nbs} + Kbs2^{nbs}}{Kbs2^{nbs}} \right) \right)$                                                                       |
| $V_6 : Int\_chol\_absp$ | Rate of cholesterol absorption from intestine into liver                    | $(k6 * 0.571 * 4.28) * \left( \frac{0.571^{nic1} + Kic}{0.571^{nic1}} \right) * \left( \frac{IBS^{nic1}}{IBS^{nic1} + Kic1^{nic1}} \right) * \left( \frac{IC}{IC^{n1}} \right)$ |
| $V_7 : Int\_chol\_excr$ | Rate of excretion of cholesterol from the intestine                         | $(k7 * 0.571 * 2) * \left( \frac{IBS}{IBS + Kie} \right) * IC * I$                                                                                                              |
| $V_8 : IC\_synth$       | Rate of cholesterol biosynthesis in the intestine                           | $\frac{ICS_{max}}{1 + \left( \frac{IC}{IC_t} \right)^{IS}}$                                                                                                                     |
| $V_9 : HC\_synth$       | Rate of cholesterol biosynthesis in the liver                               | $\frac{HCS_{max}}{1 + \left( \frac{HFC}{HC_t} \right)^{HS}}$                                                                                                                    |
| $V_{10} : BC\_release$  | Rate of cholesterol release from the liver into the bile                    | $\frac{BCR_{max}}{1 + \left( \frac{BCR_t}{HFC} \right)^{BS}}$                                                                                                                   |
| $HDLC\_synth$           | Synthesis of HDLC from nascent HDL and peripheral cholesterol               | Referred from Mc Auley et al.                                                                                                                                                   |
| $Hep\_VLDLC\_synth$     | Rate of synthesis of VLDLC in the liver and secretion into the blood stream | Referred from Mc Auley et al.                                                                                                                                                   |
| $HCE\_to\_HFC$          | Rate of hydrolysis of cholesterol ester in liver                            | Referred from Mc Auley et al.                                                                                                                                                   |
| $HFC\_to\_HCE$          | Rate of esterification of cholesterol in liver                              | Referred from Mc Auley et al.                                                                                                                                                   |
| $Hep\_IDL\_removal$     | Rate of IDLC uptake by the liver                                            | Referred from Mc Auley et al.                                                                                                                                                   |
| $Hep\_VLDLC\_removal$   | Rate of VLDLC uptake by the liver                                           | Referred from Mc Auley et al.                                                                                                                                                   |
| $Hep\_up\_LDLC$         | Rate of LDLC uptake by liver through receptors                              | Referred from Mc Auley et al.                                                                                                                                                   |
| $Hep\_up\_LDLC\_indep$  | Rate of receptor-independent LDLC uptake by liver                           | Referred from Mc Auley et al.                                                                                                                                                   |
| $Hep\_up\_HDLC$         | Rate of uptake of HDLC particles by the liver                               | Referred from Mc Auley et al.                                                                                                                                                   |

### Ordinary Differential Equations for Cholesterol Metabolism

----- Total Cholesterol -----

$$\frac{d(TC)}{dt} = HDLC_{synth} + VLDLC_{synth} - Hepatic_{uptake} - Peripheral_{uptake};$$

----- Hepatic Free Cholesterol -----

$$\begin{aligned} \frac{d(HFC)}{dt} = & HCE_{to\_HFC} - HFC_{to\_HCE} - Hep\_VLDLC_{synth} - BS_{synth} + \left( \frac{Vol_I}{Vol_L} \right) \\ & + HC_{synth} - BC_{release} + (1/(VC * Vol_L)) * (Hep\_IDL C_{removal} + Hep\_VLDLC_{removal} + Hep\_up\_LDLC + Hep\_up\_LDLC_{indep} + Hep\_up\_H) \end{aligned}$$

----- Hepatic Cholesterol Ester -----

$$\frac{d(HCE)}{dt} = HFC_{to\_HCE} - HCE_{to\_HFC};$$

----- Hepatic LDL Receptors -----

$$\frac{d(HDLR)}{dt} = Hep\_LDLR_{synth} - Hep\_LDLR_{death};$$

----- Hepatic Bile Salts -----

$$\frac{d(HBS)}{dt} = BS_{synth} + \left( \frac{Vol_I}{Vol_L} \right) * HBS_{return} - BS_{release};$$

----- Intestinal Bile Salts -----

$$\frac{d(IFS)}{dt} = \left( \frac{Vol_L}{Vol_I} \right) * BS_{release} - HBS_{return} - BS_{excr};$$

----- Intestinal Cholesterol -----

$$\frac{d(IC)}{dt} = Diet_{absp} + IC_{synth} + \left( \frac{Vol_L}{Vol_I} \right) * BC_{release} - Int_{chol}_{absp} - Int_{chol}_{excr};$$

----- Excreted Cholesterol -----

$$\frac{d(EC)}{dt} = Int_{chol}_{excr};$$

----- Excreted Bile Salts -----

$$\frac{d(EBS)}{dt} = BS_{excr};$$

## References

Mc Auley, M. T., Wilkinson, D. J., Jones, J. J. L. & Kirkwood, T. B. L. A whole-body mathematical model of cholesterol metabolism and its age-associated dysregulation. *BMC Syst. Biol.***6**, 130 (2012).
